# Supplementary material for: Comparative analysis of chemical similarity methods for modular natural products with a hypothetical structure enumeration algorithm
Source: PubMed Central journal article supplement (PMC5559407; doi:10.1186/s13321-017-0234-y), 2017-08-16
Supplement: 13321_2017_234_MOESM2_ESM.pdf [file 13321_2017_234_MOESM2_ESM.pdf]

CDK (default)

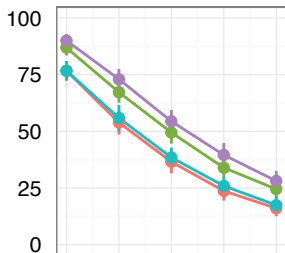

CDK (extended)

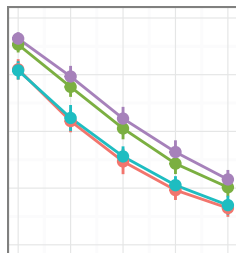

CDK (graph-only)

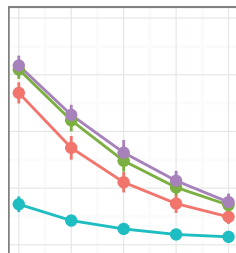

CDK (hybridization)

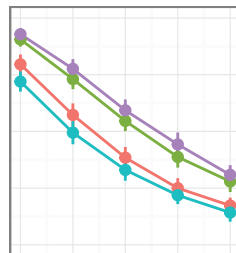

E-state

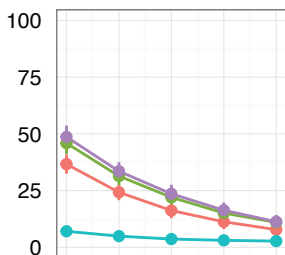

ECFP0

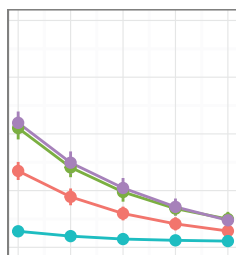

ECFP2

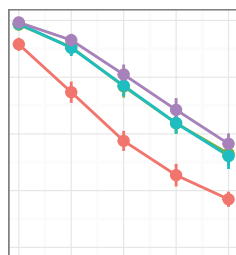

ECFP4

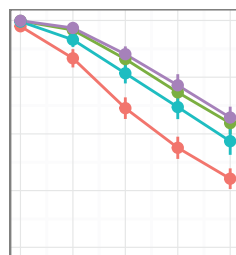

ECFP6

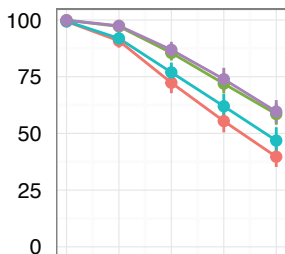

FCFP0

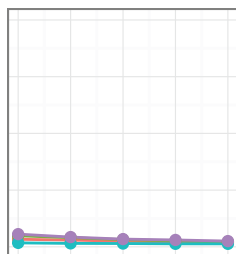

FCFP2

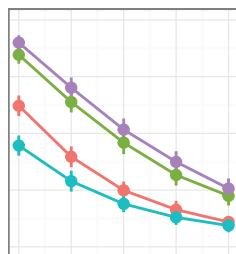

FCFP4

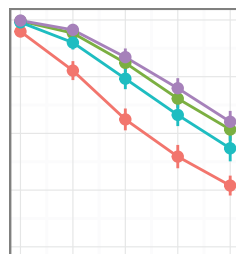

FCFP6

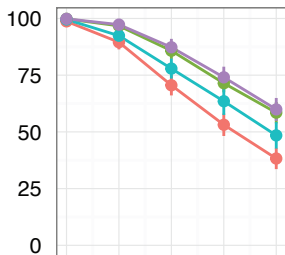

GRAPE/GARLIC

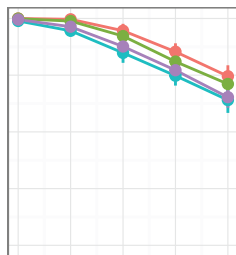

Klekota-Roth

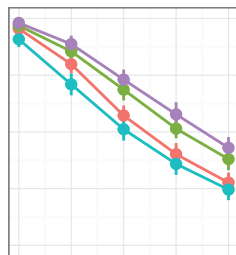

LINGO

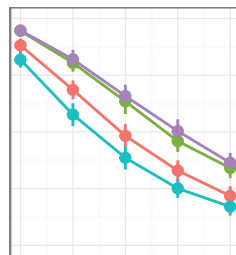

MACCS

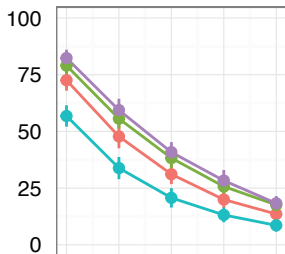

PUBCHEM

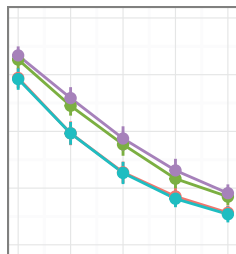**Monomer composition**

- Proteinogenic amino acids
- Proteinogenic and nonproteinogenic amino acids
- Polyketide monomers
- All three

1 2 3 4 5 1 2 3 4 5
